# Supplementary material for: Clinical Impact of Vancomycin Treatment in Ampicillin-Susceptible Enterococci Bloodstream Infections
Source: MDPI journal article supplement (doi:10.3390/antibiotics11121698), 2022-11-25
Supplement: s1 [file s1]

**Table S1.** Comparing characteristics and outcomes of beta-lactams, beta-lactams combination and vancomycin among patients with ampicillin – susceptible enterococci bloodstream infections.

| Characteristics                                              | Anti-enterococcal beta-lactams (n=123) | Anti-enterococcal beta-lactams combination (n=24) | Vancomycin (n=13) | p value  |
|--------------------------------------------------------------|----------------------------------------|---------------------------------------------------|-------------------|----------|
| Male                                                         | 76 (61.8)                              | 14 (10)                                           | 6 (46.2)          | 0.557    |
| Age (years), median (IQR)                                    | 75 (20)                                | 74 (16)                                           | 71 (22)           | 0.672    |
| ACCI, median (IQR)                                           | 5 (3)                                  | 6 (3)                                             | 6 (2)             | 0.787    |
| Immunocompromised status                                     | 19 (15.4)                              | 2 (8.3)                                           | 2 (15.4)          | 0.719    |
| Time from admission to bacteremia onset (days), median (IQR) | 4 (17)                                 | 0 (19)                                            | 18 (14)           | 0.169    |
| Hospital acquired bacteremia                                 | 68 (55.3)                              | 12 (50)                                           | 11 (84.6)         | 0.089    |
| Intensive – care unit                                        | 26 (21.1)                              | 4 (16.7)                                          | 5 (38.5)          | 0.285    |
| Mechanical ventilation                                       | 42 (34.1)                              | 8 (33.3)                                          | 8 (61.5)          | 0.155    |
| Septic shock                                                 | 27 (22.0)                              | 6 (25.0)                                          | 4 (30.8)          | 0.752    |
| PBS, median (IQR)                                            | 2 (4)                                  | 1.5 (4)                                           | 3 (5)             | 0.242    |
| Sites of infection                                           |                                        |                                                   |                   |          |
| Primary bacteremia                                           | 35 (28.5)                              | 7 (29.2)                                          | 5 (38.5)          | 0.753    |
| Intraabdominal infection                                     | 28 (22.8)                              | 3 (12.5)                                          | 4 (30.8)          | 0.388    |
| Intravascular catheter infection                             | 18 (14.6)                              | 5 (20.8)                                          | 3 (23.1)          | 0.508    |
| Urinary system infection                                     | 19 (15.4)                              | 1 (4.2)                                           | 1 (7.7)           | 0.32     |
| Infective endocarditis                                       | 5 (4.1)                                | 7 (29.2)                                          | 0                 | 0.001 *  |
| Skin and soft tissue infection                               | 9 (7.3)                                | 0                                                 | 0                 | 0.368    |
| Bone and joint infection                                     | 5 (4.1)                                | 1 (4.2)                                           | 0                 | 1.0      |
| Lower respiratory tract infection (Empyema thoracis)         | 3 (2.4)                                | 0                                                 | 0                 | 1.0      |
| Reproductive tract infection                                 | 1 (0.8)                                | 0                                                 | 0                 | 1.0      |
| Species                                                      |                                        |                                                   |                   |          |
| <i>E. faecalis</i>                                           | 107(87)                                | 23 (95.8)                                         | 9 (69.2)          | 0.08     |
| <i>E. faecium</i>                                            | 10 (8.1)                               | 0                                                 | 4 (30.8)          | 0.011 *  |
| <i>E. gallinarum</i>                                         | 2 (1.6)                                | 0                                                 | 0                 | 1.0      |
| <i>E. hirae</i>                                              | 1 (0.8)                                | 0                                                 | 0                 | 1.0      |
| <i>Enterococcus</i> spp.                                     | 3 (2.4)                                | 1 (4.2)                                           | 0                 | 1.0      |
| Polymicrobial bacteremia                                     | 34 (27.6)                              | 5 (20.8)                                          | 2 (15.4)          | 0.531    |
| Polymicrobial infection                                      | 41 (33.3)                              | 5 (20.8)                                          | 3 (23.1)          | 0.395    |
| Time to appropriate therapy (days), median (IQR)             | 1 (3)                                  | 0 (2)                                             | 0 (1)             | 0.021    |
| Switch therapy from IV to oral                               | 20 (16.3)                              | 2 (8.3)                                           | 0                 | 0.275    |
| Source control                                               | 39 (31.7)                              | 8 (33.3)                                          | 3 (23.1)          | 0.793    |
| Treatment outcomes                                           |                                        |                                                   |                   |          |
| All-cause 30 – day mortality                                 | 32 (26.0)                              | 6 (25.0)                                          | 8 (61.5)          | 0.024 *  |
| All-cause in – hospital mortality                            | 50 (40.7)                              | 8 (33.3)                                          | 9 (69.2)          | 0.092    |
| Clinical stability                                           | 94 (76.4)                              | 17 (70.8)                                         | 3 (23.1)          | <0.001 * |

| Characteristics                                     | Anti-enterococcal beta-lactams (n=123) | Anti-enterococcal beta-lactams combination (n=24) | Vancomycin (n=13) | <i>p</i> value |
|-----------------------------------------------------|----------------------------------------|---------------------------------------------------|-------------------|----------------|
| Time to clinical stability (days); median (IQR)     | 4 (5)                                  | 5 (7)                                             | 3 (-*)            | 0.494          |
| Length of stay after infection (days); median (IQR) | 18 (22)                                | 22 (31)                                           | 15 (17)           | 0.184          |
| Relapse ASE bacteremia; median (IQR)                | 6 (4.9)                                | 1 (4.2)                                           | 0                 | 1.0            |
| Microbiological clearance within 7 days (N=104)     | 64 (52)                                | 11 (45.8)                                         | 9 (69.2)          | 0.379          |
| <b>Adverse outcomes</b>                             |                                        |                                                   |                   |                |
| Vancomycin – resistant enterococci*                 | 3 (2.4)                                | 1 (4.2)                                           | 1 (7.7)           | 0.327          |
| Acute kidney injury                                 | 18 (14.6)                              | 6 (25.0)                                          | 2 (15.4)          | 0.439          |

**Abbreviations:** ACCI, age-adjusted Charlson Comorbidity Index; IV, intravenous; IQR, interquartile range; PBS, Pitt bacteremia score

\* The 25th percentile: 2, the 50th percentile: -
